# Supplementary material for: Outcomes of Different Donor Site Closure Techniques for Anterolateral Thigh (ALT) Free Flaps: A Systematic Review and Meta-analysis
Source: Research Square preprint supplement (doi:10.21203/rs.3.rs-7362584/v1), 2025-09-17
Supplement: Supplementary file 1 [file 9b44d8275959fe0845f46277.docx]

**Supplementary Data:**

### **Table S: Patient Demographics and Comorbidities.**

| **Study ID** | **Mean Age (Years)** | **Age Range/SD** | **BMI (Mean ± SD or Range)** | **Diabetes Mellitus (%)** | **Hypertension (%)** | **Smoking (%)** | **Notes on Comorbidities** |
| --- | --- | --- | --- | --- | --- | --- | --- |
| Chen et al 2005 | 51.1 ± 10.452 | N/A | N/A | N/A | N/A | N/A | N/A |
| Cheng et al 2018 | 54.9 ± 5.2 | N/A | 21.3 ± 2.665 | 10% | 10% | 0% | N/A |
| Deng et al 2018 | 42 ± 11.256 | N/A | N/A | N/A | N/A | N/A | N/A |
| Wade et al 2021 | 42.6 ± 16.4 | N/A | 29.1 ± 3.6 | N/A | N/A | N/A | N/A |
| Shieh et al 2000 | 52.2 ± NR | N/A | N/A | N/A | N/A | 86.1% | N/A |
| Schmidt et al 1997 | 43 | N/A | N/A | N/A | N/A | N/A | N/A |
| De Vicente et al 2008 | 62.3 ± 10.452 | N/A | N/A | N/A | N/A | N/A | N/A |
| Farace et al 2006 | 66.5 ± 5.888 | N/A | N/A | N/A | N/A | N/A | N/A |
| Felici et al 2006 | ~30* | 27–33 | N/A | N/A | N/A | 71.4% | N/A |
| Kimata 2000 | PDC:56.1±NR STG:38.8±NR | N/A | N/A | N/A | N/A | N/A | N/A |
| Kuo et al 2002 | 45 | 19–85 | N/A | N/A | N/A | N/A | N/A |
| Lee 2010 | 37 | 13–74 | N/A | N/A | N/A | N/A | N/A |
| Lee et al 2012 | ALT-FC:41.92 VL-MC:51.42 | N/A | N/A | N/A | N/A | N/A | N/A |
| Lipa et al 2005 | 45 ± 4 | 20–72 | N/A | N/A | N/A | N/A | N/A |
| Özkan et al 2005 | 52.5 ± 16 | N/A | N/A | N/A | N/A | N/A | 6 cancer, 4 trauma, 1 burn |
| Rodriguez et al 2007 | PDC:38.8±16.0 STG:40.1±7.8 | N/A | PDC:27.0±6.1 STG:27.3±3.6 | N/A | N/A | N/A | N/A |
| Black et al 2020 | 58.5 | 51.2–69.0 | 26.8 (25.0–30.1) | 42% | 54% | 46% | N/A |
| He et al 2022 | 40.9 ± 12.0 | N/A | N/A | 29.4% | N/A | 38.2% | N/A |
| Hanasono et al 2010 | 60 ± 15 | N/A | 24 ± 3.8 | N/A | N/A | N/A | N/A |
| Hung et al 2019 | 52.9 | N/A | 25.2 kg/m² | N/A | N/A | N/A | N/A |

Demographic data were variably reported across studies. Where provided, mean patient age ranged from approximately 30 years (Felici et al. 2006) to over 66 years (Farace et al. 2006). Most studies clustered in the 40s and 50s, indicating a middle-aged population as the primary demographic. Some studies differentiated age by closure method; for instance, Kimata (2000) reported a higher mean age in the PDC group (56.1 years) compared to the STG group (38.8 years), while Rodriguez et al. (2007) showed similar age distributions between closure techniques.Body mass index (BMI) was reported in only a few studies, with values ranging from 21.3 ± 2.665 (Cheng et al. 2018) to 29.1 ± 3.6 (Wade et al. 2021). Black et al. (2020) reported a median BMI of 26.8 (range: 25.0–30.1), while Rodriguez et al. (2007) provided BMI values stratified by closure type.

Comorbidities such as diabetes, hypertension, and smoking were inconsistently captured. Black et al. (2020) presented the most comprehensive profile, reporting diabetes in 42% of patients, hypertension in 54%, and smoking in 46%. Other studies such as Cheng et al. (2018) and He et al. (2022) also included comorbidity data, with diabetes prevalence ranging from 10% to nearly 30%. Smoking was common in several reports: for instance, 86.1% of patients in Shieh et al. (2000) and 71.4% in Felici et al. (2006) were smokers. Özkan et al. (2005) further specified comorbid patterns by listing cancer, trauma, and burn cases in their cohort.

**Table S2: Complete Donor Site Closure Techniques & Flap Details.**

| **Study ID** | **Closure Technique** | **Donor Dimensions** | **Flap Type Used** | **Follow-up Period** |
| --- | --- | --- | --- | --- |
| Chen et al 2005 | PDC/STG | 6-10cm (W), 9-20cm (L), 54-200cm² | ALT free flap | 12.9 ± 9.112 months |
| Cheng et al 2018 | PDC | 9.45cm (L), 9.93cm (W) | Modified ALT flap | 1 year |
| Deng et al 2018 | PDC/adjacent perforator flap/ipsilateral groin | 8x5 to 31x12 cm | ALT free flap | 7 ± 2.948 months |
| Wade et al 2021 | PDC/STG | 7-11 cm | ALT free flap | 212 days |
| Shieh et al 2000 | PDC/STG | N/A | ALT free flap | N/A |
| Schmidt et al 1997 | Split skin graft | N/A | ALT free flap | 14 months |
| De Vicente et al 2008 | PDC | N/A | Radial & ALT free flaps | 6 months |
| Farace et al 2006 | PDC | N/A | Forearm/ALT free flaps | 6 months |
| Felici et al 2006 | PGC | 10x12 to 11x14 cm² | Suprapubic/ALT free flaps | 5 ± 4.44 months |
| Kimata 2000 | PDC (n=32), STG (n=5) | 79.6 cm² (PDC), 411.8 cm² (STG) | Free/pedicled ALT | 18.9 months |
| Kuo et al 2002 | PDC (n=125), STG (n=15) | 10-33cm (L), 4-14cm (W) | Septocutaneous/musculocutaneous ALT | 2 years |
| Lee 2010 | PDC (n=110), STG (n=17) | 36-450 cm² (Avg: 166 cm²) | Fasciocutaneous/adipocutaneous ALT | 9.3 months |
| Lee et al 2012 | PDC if <10cm, STG if ≥10cm | ALT-FC: up to 20×10cm; VL-MC: up to 24×8cm | ALT-FC vs VL-MC | ALT-FC:12.25mo, VL-MC:15.3mo |
| Lipa et al 2005 | PDC if ≤10cm, STG if >10cm | Up to 15×30cm | ALT free flap | 17 ± 2 months |
| Özkan et al 2005 | PDC/STG | 14-27cm (L), 6-18cm (W) | Thinned ALT flaps | 13.75 ±15 months |
| Pachón et al 2014 | PDC (tubed/V-Y/split designs) | V-Y:8cm (W); Split:24.4×7.8cm; Tubed:8×16cm | Fasciocutaneous ALT | N/A |
| Posch et al 2005 | PDC/STG | STG:9-14cm; PDC:6-10cm | Chimera-type ALT | 16.6 ±17 months |
| Rodriguez et al 2007 | PDC/STG | PDC:9cm; STG:11.3cm | Suprafascial ALT | 24.8 months |
| Ross et al 2003 | PDC/STG | N/A | Standard/thinned/composite ALT | 7 months |
| Schipper et al 2006 | Primary closure | 8-10cm (W) | Myocutaneous vastus lateralis | Up to 48 months |
| Amin et al 2006 | PDC (n=13), STG (n=5) | 10-23cm (L), 6-12cm (W) | Myocutaneous/fasciocutaneous ALT | 6-36 months |
| Black et al 2020 | PDC/STG | N/A | Fasciocutaneous ALT | ALT:12.8mo, VL:10.2mo |
| Boca et al 2010 | PDC/STG | Group A:7cm (4-10cm); Group B:6.5cm | Fasciocutaneous ALT | 9.5 months |
| Camaioni et al 2008 | PDC (n=30), STG (n=1) | Mean:67.5 cm² | Thin ALT flaps | 16.2 months |
| Cao et al 2009 | PDC | 179.7 ±44.0 cm² | Free ALT flap | 12 months |
| Chan et al 2003 | PDC | N/A | Free vastus lateralis | 10 months |
| Gu et al 2020 | PDC/STG | MDC:20.1±7.7cm²; SG:20.2±9.4cm² | ALT flap | 16.4 months |
| He et al 2022 | PDC | 440.3 ±96.2 cm² | Bilateral ALT perforator flaps | 18.8 ±11.2 months |
| Hanasono et al 2010 | PDC/STG | 7.8±1.8cm (W), 19.2±5.9cm (L) | ALT free flap | 16.6 ±8.0 months |
| Hallock et al 2013 | PDC/STG | 12.2±4.3cm (W) | ALT perforator flap | 34.0 months |
| Genden et al 2005 | PDC | N/A | ALT flap | N/A |
| Hung et al 2019 | PDC/STG | 130 cm², 8.1cm (W) | ALT flap | 23.5 days |

Across the included studies, the most common reconstructive approach was the use of free or pedicled anterolateral thigh (ALT) flaps, implemented in all 32 studies. Donor site management strategies varied based on defect size and institutional preference. Primary donor site closure (PDC) was the predominant method, employed either alone or in conjunction with split-thickness skin grafts (STG). Specifically, at least 13 studies utilized a combination of PDC and STG, while others used PDC alone (e.g., Cao et al. 2009, De Vicente et al. 2008). Only a minority of studies—such as Schmidt et al. (1997)—relied solely on skin grafts.

Donor site dimensions, when reported, showed substantial variability. Widths ranged from as little as 4 cm to as wide as 18 cm (e.g., Özkan et al. 2005, Kimata 2000), while lengths extended from 6 cm to as much as 33 cm (Kuo et al. 2002). Total surface areas ranged from smaller defects averaging 20–70 cm² (e.g., Gu et al. 2020, Camaioni et al. 2008) to extensive defects exceeding 400 cm² (He et al. 2022). Several studies (e.g., Lee et al. 2012, Lipa et al. 2005) tailored the closure method based on defect size, opting for PDC in defects ≤10 cm and STG in larger wounds.

Flap types included standard fasciocutaneous ALT flaps, thinned or composite ALT flaps, and in some cases, specialized modifications such as vastus lateralis musculocutaneous (VL-MC) flaps (Lee et al. 2012) and chimera-type flaps (Posch et al. 2005). Follow-up durations were inconsistently reported but generally ranged between 6 and 18 months. The longest recorded follow-up was 48 months (Schipper et al. 2006), while the shortest was just over 23 days (Hung et al. 2019). Mean follow-up often fell around 12–17 months in most series with available data.

**Table S3: Quality assesment of cohort studies using JBI checklist.**

| Study ID | 1 | 2 | 3 | 4 | 5 | 6 | 7 | 8 | 9 | 10 | 11 | Yes% | Risk |
| --- | --- | --- | --- | --- | --- | --- | --- | --- | --- | --- | --- | --- | --- |
| hung et al 2019 | NO | Yes | Yes | No | No | Yes | Yes | Yes | Yes | NA | YES | 64% | Moderate |
| genden et al 2005 | Yes | Yes | Yes | No | No | Yes | Yes | Yes | Yes | NA | No | 64% | Moderate |
| hallock et al 2013 | NO | NA | NA | No | No | Yes | Yes | Yes | Yes | No | No | 36% | High |
| hanasono et al 2010 | Unclear | Unclear | Unclear | No | No | Yes | Yes | Yes | Yes | No | YES | 45% | High |
| kimata et al 1999 | NO | NA | Unclear | No | No | Yes | Yes | Yes | Yes | NA | YES | 45% | High |
| kimata et al 1999 | NO | NA | Unclear | No | No | Yes | Yes | Yes | No | No | YES | 36% | High |
| Quality assessment based on JBI checklist for cohort studies developed by Joanna Briggs Institute which include 11 questions:  Q1: Were the two groups similar and recruited from the same population?  Q2: Were the exposures measured similarly to assign people to both exposed and unexposed groups?  Q3: Was the exposure measured in a valid and reliable way?  Q4: Were confounding factors identified?  Q5: Were strategies to deal with confounding factors stated?  Q6: Were the groups/participants free of the outcome at the start of the study (or at the moment of exposure)?  Q7: Were the outcomes measured in a valid and reliable way?  Q8: Was the follow up time reported and sufficient to be long enough for outcomes to occur?  Q9: Was follow up complete, and if not, were the reasons to loss to follow up described and explored?  Q10: Were strategies to address incomplete follow up utilized?  Q11: Was appropriate statistical analysis used?  Scoring system: Low>70%, Moderate 50-60%, High<=49% | | | | | | | | | | | | | |

**Table S4: Quality assesment for case series using JBI checklist.**

| Study ID | 1 | 2 | 3 | 4 | 5 | 6 | 7 | 8 | 9 | 10 | score | Risk |
| --- | --- | --- | --- | --- | --- | --- | --- | --- | --- | --- | --- | --- |
| Ross et.al 2001 | Yes | Yes | Yes | Unclear | Unclear | Yes | Yes | Yes | No | No | 7/10 | Moderate |
| Posch et.al 2005 | No | Unclear | Unclear | Unclear | Unclear | Yes | Yes | Yes | No | No | 5/10 | High |
| Pachón et al 2014 | Yes | Unclear | Unclear | Unclear | Unclear | Yes | Yes | Yes | No | No | 6/10 | Moderate |
| Ozkan et al 2005 | No | Unclear | Unclear | Unclear | Unclear | Yes | Yes | Yes | No | No | 5/10 | High |
| kuo et al 2002 | Yes | Unclear | Unclear | Unclear | Unclear | Yes | Yes | Yes | No | No | 6/10 | Moderate |
| Felici et al 2006 | No | No | No | Unclear | Unclear | Yes | No | Yes | Yes | No | 4/10 | High |
| Schmidt et al 1997 | Yes | No | No | Unclear | Unclear | Yes | Yes | Yes | No | No | 5/10 | High |
| shieh et al 2000 | Yes | Unclear | Unclear | Yes | Unclear | Yes | No | Yes | No | No | 5.5/10 | Moderate |
| Wade et al . 2021 | Yes | Yes | Yes | Unclear | Unclear | Yes | Yes | Yes | Yes | No | 8/10 | Moderate |
| Deng et al 2018 | Yes | NA | NA | Unclear | Unclear | Yes | Yes | Yes | No | No | 5/10 | High |
| cheng et al 2018 | Yes | Yes | Yes | Unclear | Unclear | Yes | Yes | Yes | Yes | No | 8/10 | Moderate |
| chen et al 2005 | Yes | Yes | Yes | Unclear | Unclear | Yes | Yes | Yes | Yes | No | 8/10 | Moderate |
| Schippera et al 2006 | Yes | Yes | Yes | Unclear | Unclear | Yes | Yes | Yes | No | No | 7/10 | Moderate |
| chana et al 2003 | Yes | Unclear | Unclear | Unclear | Unclear | Yes | Yes | Yes | Yes | No | 7/10 | Moderate |
| boca et al 2010 | Yes | NA | NA | Yes | Yes | Yes | Yes | Yes | No | Yes | 7/10 | Moderate |
| Amin et al 2006 | No | NA | Unclear | Unclear | Unclear | Yes | Yes | Yes | Yes | No | 5.5/10 | Moderate |
| rodriguez et al 2007 | Yes | NA | NA | Unclear | Unclear | Yes | Yes | Yes | Yes | Yes | 7/10 | Moderate |
| lee et al 2010 | Yes | Unclear | Unclear | Yes | Yes | Yes | No | Yes | Yes | No | 7/10 | Moderate |
| Quality assessment is based on JBI checklist for case series developed by Joanna Briggs Institute which includes 10 questions:  Q1: Were there clear criteria for inclusion in the case series?  Q2: Was the condition measured in a standard, reliable way for all participants included in the case series?  Q3: Were valid methods used for identification of the condition for all participants included in the case series?  Q4: Did the case series have consecutive inclusion of participants?  Q5: Did the case series have complete inclusion of participants?  Q6: Was there clear reporting of the demographics of the participants in the study?  Q7: Was there clear reporting of clinical information of the participants?  Q8: Were the outcomes or follow-up results of cases clearly reported?  Q9: Was there clear reporting of the presenting site(s)/clinic(s) demographic information?  Q10: Was statistical analysis appropriate?  Scoring system: Low >8 , 5 < Moderate <=8, High <=5 | | | | | | | | | | | | |
